# Supplementary material
Source: publisher site journal article supplement (https://www.dovepress.com/article/386936)
Supplement: Supplementary file 1 [file get_supplementary_file.php]

**Supplementary Table 1:** The various mullerian anomalies found among patients with categorization according to the three classification systems.

| Associated anomalies/ notes | New ASRM classification | AFS Classification | ESHRE Classification | Author description | | | cases |
| --- | --- | --- | --- | --- | --- | --- | --- |
| vagina | Cervix | Uterus |
|  | Cervical agenesis with associated vaginal agenesis | I e | U0C4V4 | Agenesis | Non canalised cervix | normal with hematometra | 1 |
|  | Cervical agenesis | I b | U0C4V0 | Normal | Non canalized cervix | Normal with hematometra | 2 |
|  | Mullerian agenesis with L atrophic uterine remnant with functional endometrium | Not classified | U5aC4V4 | Agenesis | Agenesis | Agenesis with  L cavitory mullerian remnant | 3 |
|  | Mullerian agenesis | I e | U5bC4V4 | Agenesis | Agenesis | Agenesis | 4 |
|  | Mullerian agenesis | I e | U5bC4V4 | Agenesis | Agenesis | Agenesis | 5 |
| Single kidney, hypoplastic thumb,neurogenic bladder | Mullerian agenesis | I e | U5bC4V4 | Agenesis | Agenesis | Agenesis | 6 |
| Single right kidney | Mullerian agenesis with R atrophic uterine remnant | Not classified | U5bC4V4 | Agenesis | Agenesis | Agenesis with R non cavitory mullerian remnant | 7 |
|  | Not described | I c | **U6C0V0** | Normal | Normal | Partial agenesis of uterine fundus | 8 |
|  | Mullerian agenesis with L atrophic uterine remnant | Not classified | U5bC4V4 | Agenesis | Agenesis | Agenesis with non cavitory L mullerian remnant | 9 |
| Absent gonads, XX karyotype | Mullerian agenesis | I e | U5bC4V4 | Agenesis | Agenesis | Agenesis | 10 |
|  | Mullerian agenesis | I e | U5bC4V4 | Agenesis | Agenesis | Agenesis | 11 |
|  | Mullerian agenesis with R atrophic uterine remnant with functional endometrium and L atrophic remnant | Not classified | U5a,bC4V4 | Agenesis | Agenesis | Agenesis with R cavitory remnant and L non cavitory remnant | 12 |
| Normal ovaries | Not described | I  (not clarified) | U1bC0V0 | Normal | Normal | Hypoplastic/  Infantile uterus | 13 |
| Normal ovaries | Not described | I  (not clarified) | U1bC0V0 | Normal | Normal | Hypoplastic/  Infantile uterus | 14 |
| Normal ovaries, Horseshoe kidney, Wolfram syndrome | Not described | I  (not clarified) | U1bC0V0 | Normal | Normal | Hypoplastic/  Infantile uterus | 15 |
| Normal ovaries | Not described | I  (not clarified) | U1bC0V0 | Normal | Normal | Hypoplastic/  Infantile uterus | 16 |
| Small both ovaries | Not described | I  (not clarified) | U1bC0V0 | Normal | Normal | Hypoplastic/  Infantile uterus | 17 |
| Small both ovaries | Not described | I  (not clarified) | U1bC0V0 | Normal | Normal | Hypoplastic/  Infantile uterus | 18 |
| Small both ovaries | Not described | I  (not clarified) | U1bC0V0 | Normal | Normal | Hypoplastic/  Infantile uterus | 19 |
| Small both ovaries | Not described | I  (not clarified) | U1bC0V0 | Normal | Normal | Hypoplastic/  Infantile uterus | 20 |
| Small both ovaries | Not described | I  (not clarified) | U1bC0V0 | Normal | Normal | Hypoplastic/  Infantile uterus | 21 |
| Small both ovaries | Not desribed | I  (not clarified) | U1bC0V0 | Normal | Normal | Hypoplastic/  Infantile uterus | 22 |
| No ovaries seen  No karyotype available | Not desribed | I  (not clarified) | U1bC0V0 | Normal | Normal | Hypoplastic/  Infantile uterus | 23 |
| No ovaries seen  XX karyotype | Not desribed | I  (not clarified) | U1bC0V0 | Normal | Normal | Hypoplastic/  Infantile uterus | 24 |
| No ovaries seen Turner syndrome | Not desribed | I  (not clarified) | U1bC0V0 | Normal | Normal | Hypoplastic/  Infantile uterus | 25 |
| No ovaries seen  XX karyotype | Not desribed | I  (not clarified) | U1bC0V0 | Normal | Normal | Hypoplastic/  Infantile uterus | 26 |
| No ovaries seen  No karyotype available | Not desribed | I  (not clarified) | U1bC0V0 | Normal | Normal | Hypoplastic/  Infantile uterus | 27 |
| No ovaries seen  XX karyotype | Not desribed | I  (not clarified) | U1bC0V0 | Normal | Normal | Hypoplastic/  Infantile uterus | 28 |
| Severe bilat hydrouretro-nephrosis with ectopic insertion of L ureter into the urinary bladder, known case of cloaca | Not desribed | Not classified | U3bC2V3 | Single dilated vagina with mid transverse septum | Double cervices | Didelphys with hematometra | 29 |
| Absent R kidney (OHVIRA) | Uterus didelphys and obstructed R hemivagina | Not classified | U3bC2V2 | Longitudinal vaginal septum with obstructed R hemivagina | Double cervices | Didelphys | 30 |
| Single L kidney which shows medullary nephrocalcinosis, celiac disease | Uterus didelphys and longitudinal vaginal septum | Not classified | U3bC2V1 | Longitudinal vaginal septum | Double cervices | Didelphys | 31 |
| Absent R kidney (OHVIRA), CAH with urogenital sinus anomaly | Uterus didelphys and obstructed R hemivagina | Not classified | U3bC2V2 | Longitudinal vaginal septum with obstructed R hemivagina.  L hemivagina connects to the urethra | Double cervices | Didelphys | 32 |
| Cloaca variant (Hx of operated imperforate anus) | Uterus didelphys and longitudinal vaginal septum of variable length | Not classified | U3bC2V1 | Incomplete longitudinal septum with the common distal vagina joining the urethra | Double cervices | Didelphys | 33 |
|  | Partial septate uterus | V b | U2aC0V0 | Normal | Normal | Partially septate | 34 |
| R ovarian endometrioma | Not described | Not classified | U2aC0V3 | Mid vaginal transverse septum | Normal | Partially septate | 35 |
|  | Partial septate uterus | V b | U2aC0V0 | Normal | Normal | Partially septate | 36 |
|  | Partial septate uterus | V b | U2aC0V0 | Normal | Normal | Partially septate | 37 |
|  | Partial septate uterus | V b | U2aC0V0 | Normal | Normal | Partially septate | 38 |
|  | Partial septate uterus | V b | U2aC0V0 | Normal | Normal | Partially septate | 39 |
|  | Partial septate uterus | V b | U2aC0V0 | Normal | Normal | Partially septate | 40 |
|  | Partial septate uterus | V b | U2aC0V0 | Normal | Normal | Partially septate | 41 |
|  | Partial septate uterus | V b | U2aC0V0 | Normal | Normal | Partially septate | 42 |
|  | Not described | V a | U2bC1V0 | Normal | Septate cervix | Complete septate | 43 |
| Single kidney, urogenital sinus anomaly, syndactyly (Fraser syndrome) | Not described | V a | U2bC2V0 | Dilated fluid filled vagina connecting distally to the urinary bladder | Double cervices | Complete septate | 44 |
|  | Complete septate uterus with septate cervix and longitudinal vaginal septum | Not classified | U2bC2V1 | Completely septate vagina | Septate cervix | Complete septate | 45 |
|  | LUnicornuate uterus with R associated atrophic uterine remnant with functional endometrium | II b | U4aC0V0 | Normal | Normal | Unicornuate with non communicating R cavitory horn | 46 |
| single L kidney | L Unicornuate uterus with R associated atrophic uterine remnant with functional endometrium | II b | U4aC0V0 | Normal | Normal | Unicornuate with non communicating R cavitory horn | 47 |
| Single L kidney,  sacral lipomyelomeningocele | L Unicornuate uterus | II d | U4bC0V0 | Normal | Normal | Unicornuate  ( only L horn seen) | 48 |
| Endometrial ca in the R horn | R Unicornuate uterus with L uterine horn communicating at level of cervix | II a | U4aC0V0 | Normal | Normal | Unicornuate with communicating cavitory L horn | 49 |
|  | L Unicornuate uterus with R associated atrophic uterine remnant | II c | U4bC0V0 | Normal | Normal | Unicornuate with rudimentary R horn | 50 |
|  | R Unicornuate uterus with L associated atrophic uterine remnant with functional endometrium | II b | U4aC0V0 | Normal | Normal | Unicornuate with non communicating L cavitory horn | 51 |
|  | R Unicornuate uterus | II d | U4bC0V0 | Normal | Normal | Unicornuate  (only R horn seen) | 52 |
|  | Not described | Not classified | U3cC4V0 | Normal | Septate cervix with distal cervical agenesis | Bicornuate bicollis with hematometra | 53 |
|  | Bicornuate uterus | IV b | U3aC0V0 | Normal | Normal | Bicornuate unicollis | 54 |
|  | Bicornuate uterus | IV b | U3aC0V0 | Normal | Normal | Bicornuate unicollis | 55 |
|  | Bicornuate uterus | IV b | U3aC0V0 | Normal | Normal | Bicornuate unicollis | 56 |
| Bilateral ovarian teratodermoids | Bicornuate uterus | IV b | U3aC0V0 | Normal | Normal | Bicornuate unicollis | 57 |
|  | Bicornuate uterus | IV b | U3aC0V0 | Normal | Normal | Bicornuate unicollis | 58 |
|  | Bicornuate uterus | IV b | U3aC0V0 | Normal | Normal | Bicornuate unicollis | 59 |
|  | Not described | Not classified | U3aC4V0 | Normal | Elongated non canalized cervix | Bicornuate unicollis with hematometra bilaterally | 60 |
|  | Distal vaginal agenesis | I a | U0C0V4 | Atretic mid and distal vagina | Normal with hematometra | Normal with hematometra | 61 |
|  | Low transverse vaginal septum | Not classified | U0C0V3 | Low transverse septum | Normal with hematometra | Normal with hematometra & L hematosalpinx | 62 |
|  | Distal cervical agenesis and variable vaginal length | I a | U0C4V4 | Complete atresia | Distal cervical agenesis | Normal with hematometra & hematosalpinges | 63 |
|  | Distal vaginal agenesis | I a | U0C0V4 | Atretic mid and distal vagina | Normal with hematometra | Normal with hematometra | 64 |

| Other associated anomalies | Ovarian abnormalities | Associated urinary tract anomalies | No. of cases | Mullerian anomaly type |
| --- | --- | --- | --- | --- |
| One case had neurogenic bladder. Hypoplastic thumbs |  | Single kidney | 2 | Mullerian agenesis |
| One case had urogenital sinus anomaly. Had also CAH |  | Single kideny | 2 | Uterus didelphys (OHVIRA syndrome) |
|  |  | Single kidney with medullary nephrocalcinosis | 1 | Uterus didelphys |
| Cloaca |  | Severe bilat hydrouretronephrosis with ectopic insertion of L ureter into UB | 1 | Uterus didelphys |
| One case had sacral Lipomeylomeningocele |  | Single kidney | 2 | Unicoruate uterus |
| Urogenital sinus anomaly. Fraser syndrome |  | Single kidney | 1 | complete Septate uterus |
| Wolfram syndrome |  | Horseshoe kidney | 1 | Infantile uterus |
|  | Absent ovaries/gonads (XX karyotype) |  | 1 | Mullerian agenesis |
|  | Ectopic L ovary in L anterolateral pelvis |  | 2 | Mullerian agenesis |
|  | Anteriorly located L ovary above L horn |  | 1 | Unicornuate with R cavitory non communicating horn |
|  | Ovarian endometriomas |  | 2 | Partial septate uterus |
|  | Bilateral teratomas |  | 1 | Bicornuate uterus |
|  | Small ovaries for age |  | 7 | Infantile uterus |
|  | No ovaries/gonads identified ( 3 with XX karyotype, one XO) |  | 5 | Infantile uterus |
| Endometrial CA in the dominant horn |  |  | 1 | Unicornuate uterus |

**Supplementary Table 2:** Different associated urinary and other non-mullerian anomalies
